# Supplementary material for: Pan‐Cancer Single‐Nucleus Total RNA Sequencing Using snHH‐Seq
Source: PubMed Central journal article supplement (PMC10837386; doi:10.1002/advs.202304755), 2023-11-27
Supplement: ADVS-11-2304755-s006.pdf [file ADVS-11-2304755-s006.pdf]

# ADVANCED SCIENCE

Open Access

## Supporting Information

for *Adv. Sci.*, DOI 10.1002/adv.202304755

Pan-Cancer Single-Nucleus Total RNA Sequencing Using snHH-Seq

*Haide Chen, Xiunan Fang, Jikai Shao, Qi Zhang, Liwei Xu, Jiaye Chen, Yuqing Mei, Mengmeng Jiang, Yuting Wang, Zhouyang Li, Zihang Chen, Yang Chen, Chengxuan Yu, Lifeng Ma, Peijing Zhang, Tianyu Zhang, Yuan Liao, Yuexiao Lv, Xueyi Wang, Lei Yang, Yuting Fu, Daobao Chen, Liming Jiang, Feng Yan, Wei Lu, Gao Chen, Huahao Shen, Jingjing Wang\*, Changchun Wang\*, Tingbo Liang\*, Xiaoping Han\*, Yongcheng Wang\* and Guoji Guo\**

1 Supporting Information

2 **Pan-cancer single-nucleus total RNA sequencing using snHH-seq**

3 *Haide Chen, Xiunan Fang, Jikai Shao, Qi Zhang, Liwei Xu, Jiaye Chen, Yuqing Mei,*  
4 *Mengmeng Jiang, Yuting Wang, Zhouyang Li, Zihang Chen, Yang Chen, Chengxuan*  
5 *Yu, Lifeng Ma, Peijing Zhang, Tianyu Zhang, Yuan Liao, Yuexiao Lv, Xueyi Wang, Lei*  
6 *Yang, Yuting Fu, Daobao Chen, Liming Jiang, Feng Yan, Wei Lu, Gao Chen, Huahao*  
7 *Shen, Jingjing Wang\*, Changchun Wang\*, Tingbo Liang\*, Xiaoping Han\*, Yongcheng*  
8 *Wang\*, and Guoji Guo\**

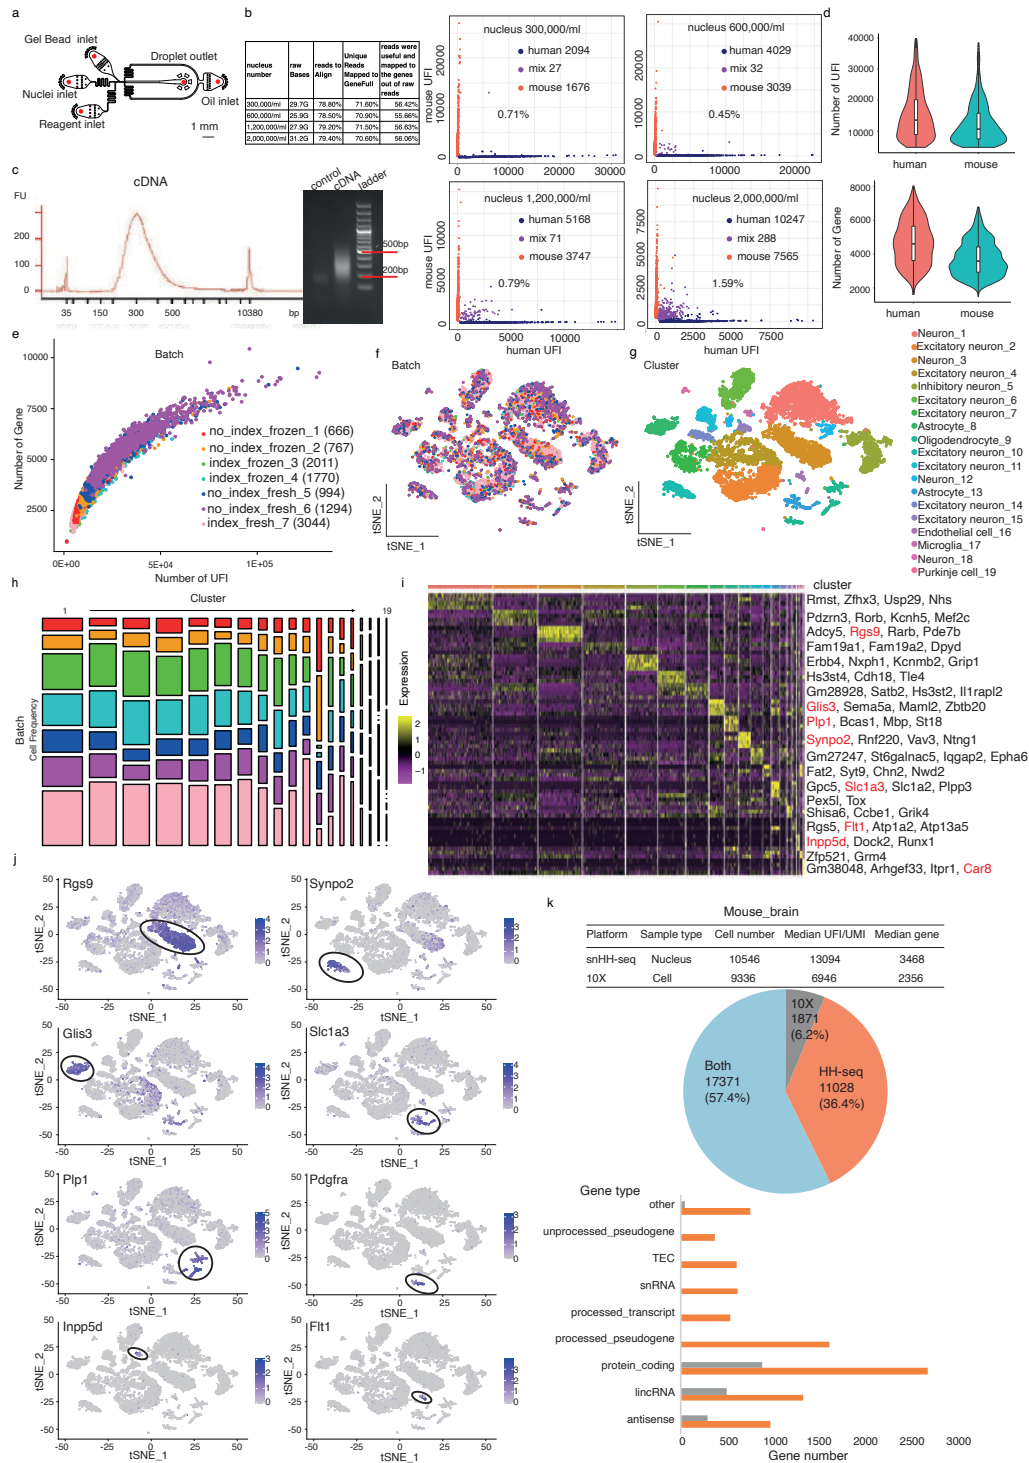

9

10 **Supplementary Figure 1. Validation of the snHH-Seq Platform**

11 **a)** Design of the device for nuclei, bead and mix reagents encapsulation. **b)** Human–  
 12 mouse mix test with nuclei overloading. The fractions of reads used in gene mapping  
 13 (left), the scatter plot of human–mouse mix test (right) with different nuclei overloading

14 (8 pre-index barcodes, load with ~300,000 nuclei/ml to ~2,000,000 nuclei/ml, 150  $\mu$ L  
15 droplet). **c)** Size distribution of enriched cDNA (human-mouse mix) obtained using  
16 snHH-seq. 2100 bioanalyzer (**left**), gel electrophoresis (**right**). **d)** Distribution of UFI  
17 (left) and Gene (right) detected in 293T (human) and 3T3 (mouse) nuclei (for Figure  
18 1d). **e)** UFI/gene plot for mouse brain with different batches. No\_index, RT primer  
19 without barcode; index, RT primer with barcode; frozen, nuclei isolated from frozen  
20 sample; fresh, nuclei isolated from fresh sample. **f)-g)** t-SNE of mouse brain single  
21 nucleus profiles from different batches, colored by batch (**f**) and assigned cell subset  
22 signature (**g**). **h)** Cell type composition of mouse brain. Proportion of cells in each  
23 cluster in each of the 7 batches. **i)** Heatmap of top differentially expressed genes for  
24 mouse brain. Yellow corresponds to high-expression levels; purple and black  
25 correspond to low-expression levels. **j)** t-SNE maps of mouse brain with cells colored  
26 based on the expression of cell type markers. Gene expression levels are indicated by  
27 shades of purple. **k)** Percentage of genes detected in snHH-seq compared to 10X for  
28 mouse brain. 57.4% of the detected genes were shared between the methods; 36.4%  
29 were detected only in snHH-seq; and 6.2% were detected only in 10X Chromium (top).  
30 Counts of different RNA biotypes (bottom). 10X whole mouse brain dataset  
31 GSM6617915.



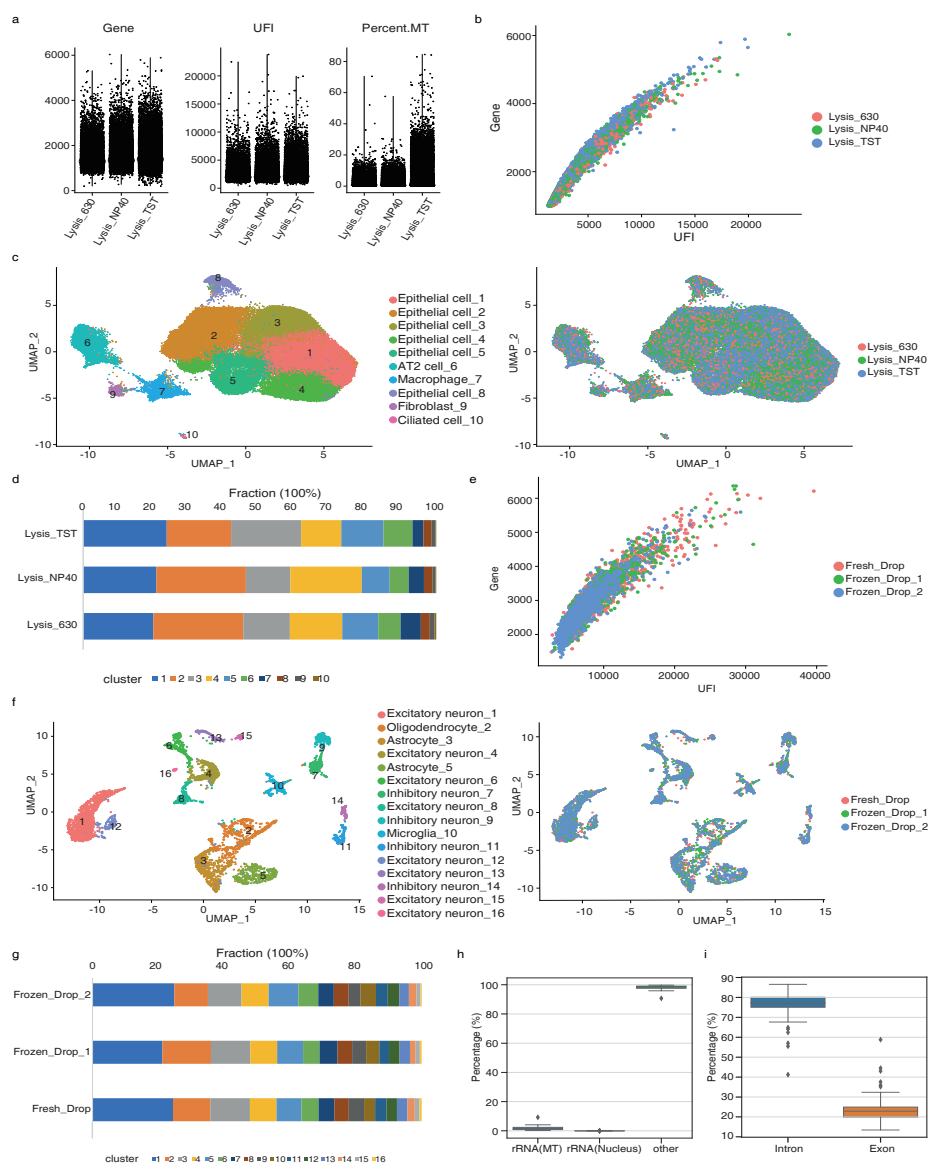

32

### 33 Supplementary Figure 2. snHH-seq performs in cancer samples

34 **a)** Distributions of gene, UFI and mt-gene detected in lung cancer (P7) with different  
 35 lysis buffers. Lysis-630, 0.1% IGEPAL CA-630 with salts and Tris; Lysis-NP40, 0.1%  
 36 NP40 with salts and Tris; Lysis-TST, Tween with salts and Tris. **b)** UFI/gene plot for  
 37 lung cancer (P7) with different lysis buffers. **c)** UMAP of lung cancer (P7) single  
 38 nucleus profiles from three buffers, colored by assigned cell subset signature (left) and  
 39 buffer (right). **d)** Cell type composition of lung cancer (P7). Proportion of cells in each  
 40 cluster in each of the three buffers. **e)** UFI/gene plot for brain cancer (part of Glioma

41 P2/P3/P4) with different protocols. Fresh-Drop, nuclei are not cryopreserved before  
42 drop procedure; Frozen-Drop, nuclei are cryopreserved before drop procedure. **f)**  
43 UMAP of brain cancer single nucleus profiles from different protocols, colored by  
44 assigned cell subset signature (left) and protocol (right). **g)** Cell type composition of  
45 brain cancer. Proportion of cells in each cluster in each of the two protocols. **h)** The  
46 percentage of rRNA UFI detected in snHH-seq. Box plots show median, quartiles, and  
47 whiskers at 1.5 times the interquartile range (IQR). **i)** The percentage of exon and intron  
48 detected in snHH-seq. Box plots show median, quartiles, and whiskers at 1.5 times the  
49 interquartile range (IQR).

50

51

52

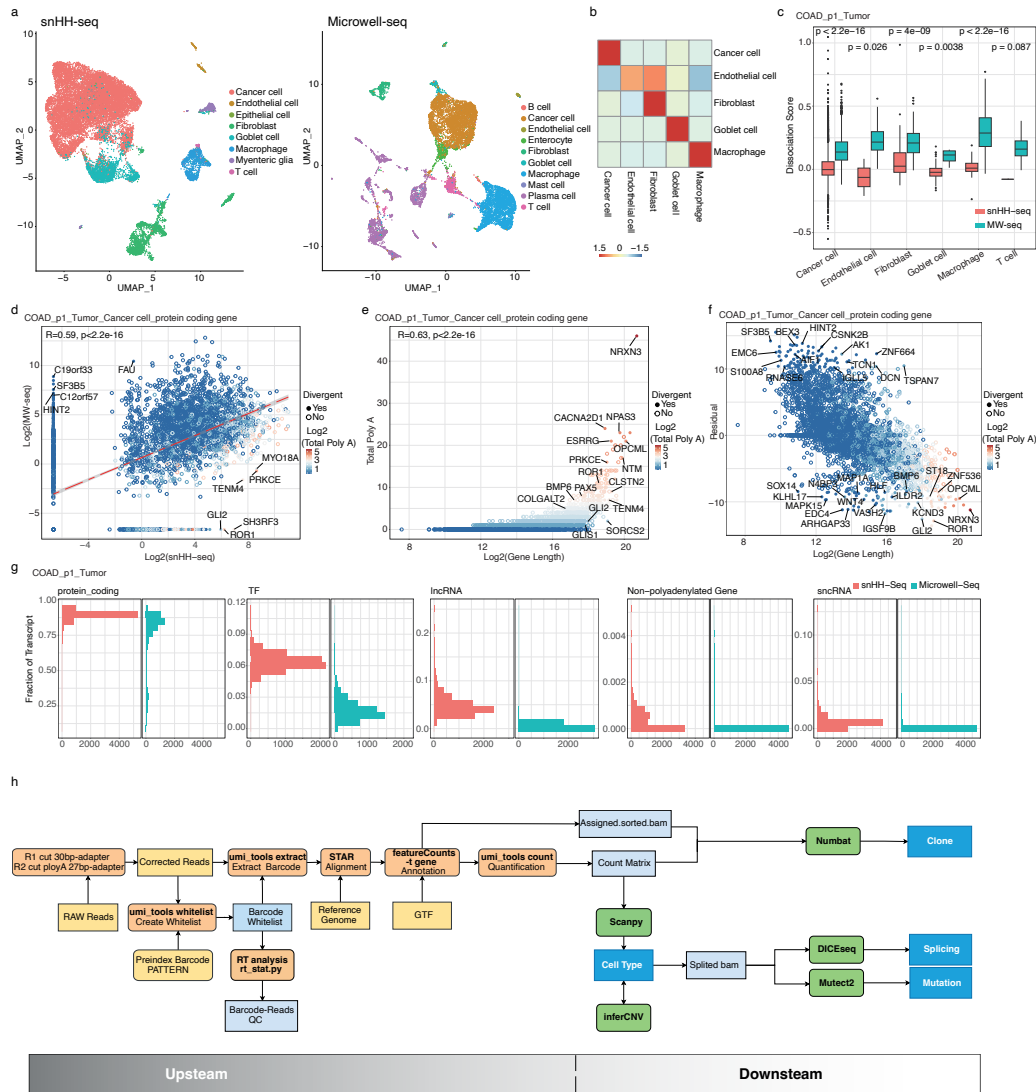

53

54 **Supplementary Figure 3. Comparison of gene detection between snHH-seq and**  
 55 **Microwell-seq**

56 **a)** UMAP visualization of single nucleus profiles (snHH-seq, left) and single cell  
 57 profiles (Microwell-seq, right) for COAD\_P1. **b)** Cell-type correlation analysis  
 58 matched cell types between snHH-seq and Microwell-seq for COAD\_P1. **c)** Tissue  
 59 dissociation expression signatures in scRNA-seq of COAD\_P1\_tumor. Scores [y axis,  
 60 average background corrected log(TP10K+1)] of a dissociation-related stress signature  
 61 in scRNA-seq (blue) and snRNA-seq (pink) profiles in each major colon cell type (x  
 62 axis) are shown. Wilcoxon rank sum test, box plots show median, quartiles, and  
 63 whiskers at 1.5 times the interquartile range (IQR). **d)** Divergent genes between cell

64 and nucleus profiles. Averaged pseudobulk expression of protein coding genes (dots) in  
65 COAD\_P1\_tumor cancer nuclei (x axis) and cells (y axis) is shown. Divergent genes  
66 are represented by black dot. The color scale shows the total length of polyA stretches.  
67 **e)-f)** Relation between gene expression differences in nuclei vs. cells, gene length and  
68 polyA stretches. **(e)** The number of polyA stretches (y-axis) and length (x-axis) of each  
69 gene. **(f)** Divergence (y-axis, residual of straight-line regression fit) between  
70 pseudobulk gene expression of single cell and single nucleus RNA-seq and gene length  
71 (x-axis) for each protein coding gene expressed in COAD\_P1\_tumor cancer cell in both  
72 datasets. **g)** Fraction of transcripts per biotype in snHH-seq compared to Microwell-seq  
73 for COAD\_P1\_tumor. **h)** Workflow for analyzing tumor samples.

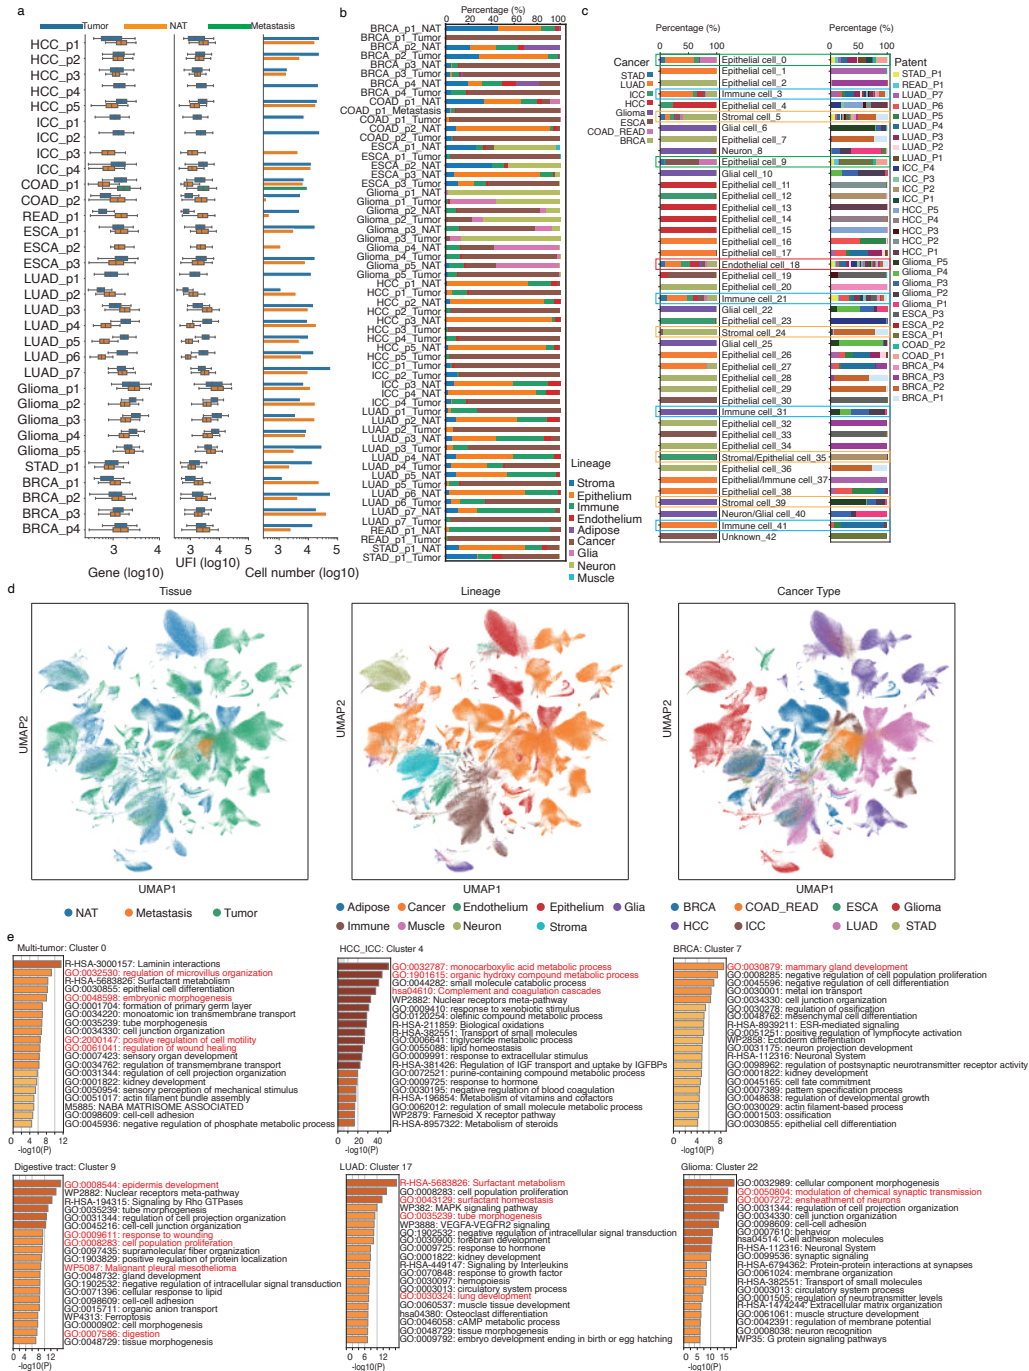

74

75 **Supplementary Figure 4. Construction of the pan-cancer landscape using snHH-**  
 76 **seq**

77 **a)** Bar plots representing per patient from left to right: the number of genes, the number  
 78 of UFIs, the number of cells. Box plots show median, quartiles, and whiskers at 1.5  
 79 times the interquartile range (IQR). **b)** The fraction of lineage per sample. **c)** The  
 80 fraction of cells per tumor and per patient in each cell cluster (cell cluster in Figure 2c).

81 **d)** Uniform manifold approximation and projection (UMAP) embedding of cells from  
82 the 32 tumors analyzed in this study. Color-coded for tissue (left), lineage (middle) and  
83 cancer type (right). **e)** Gene ontology (GO) enrichment of cluster 0, 4, 7, 9, 17 and 22  
84 (cell cluster in Figure 2c) using Metascape. (p values was calculated by the  
85 hypergeometric distribution, statistical test is one-sided, adjustments p values were  
86 made after p value is corrected by Benjamin & Hochberg multiple test).

87

88

89

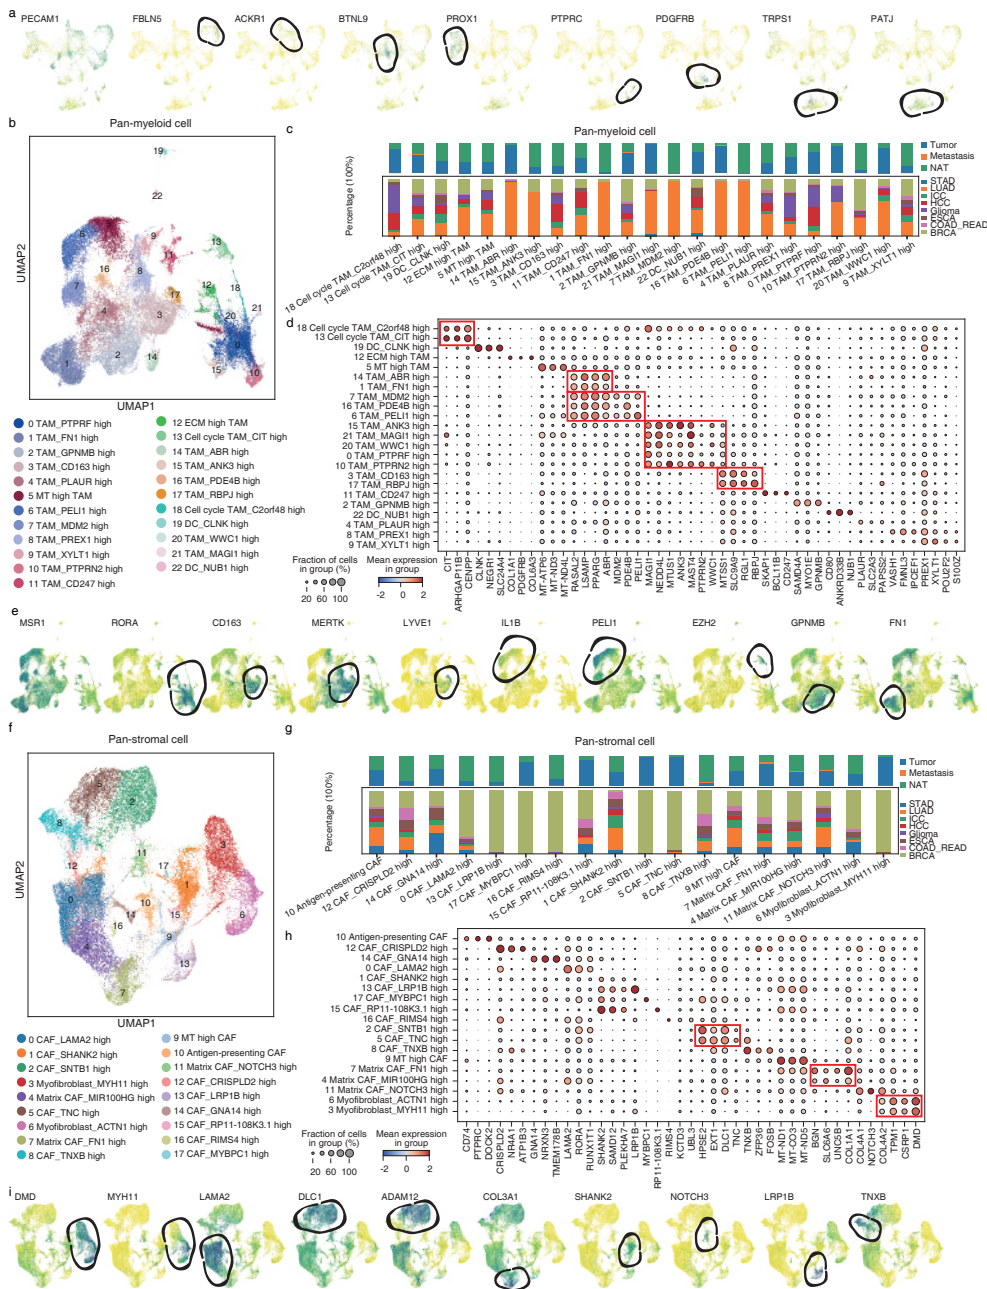

90

91 **Supplementary Figure 5. Characterization of pan-cancer endothelial cell,**  
 92 **myeloid cells and stromal cells**

93 **a)** Marker genes expression for each cluster of tumor endothelial cells. **b)** UMAP of  
 94 pan-cancer myeloid cells. **c)** Tumor distribution in each myeloid cell cluster. Color-  
 95 coded for tumor. **d)** Marker genes expression per myeloid cell cluster. **e)** Marker genes  
 96 expression for each cluster of myeloid cells. **f)** UMAP of pan-cancer stromal cells. **g)**

97 Tumor distribution in each stromal cell cluster. Color-coded for tumor. **h)** Marker genes  
98 expression per stromal cell cluster. **i)** Marker genes expression for each cluster of  
99 stromal cells.

100

101

102

103

104



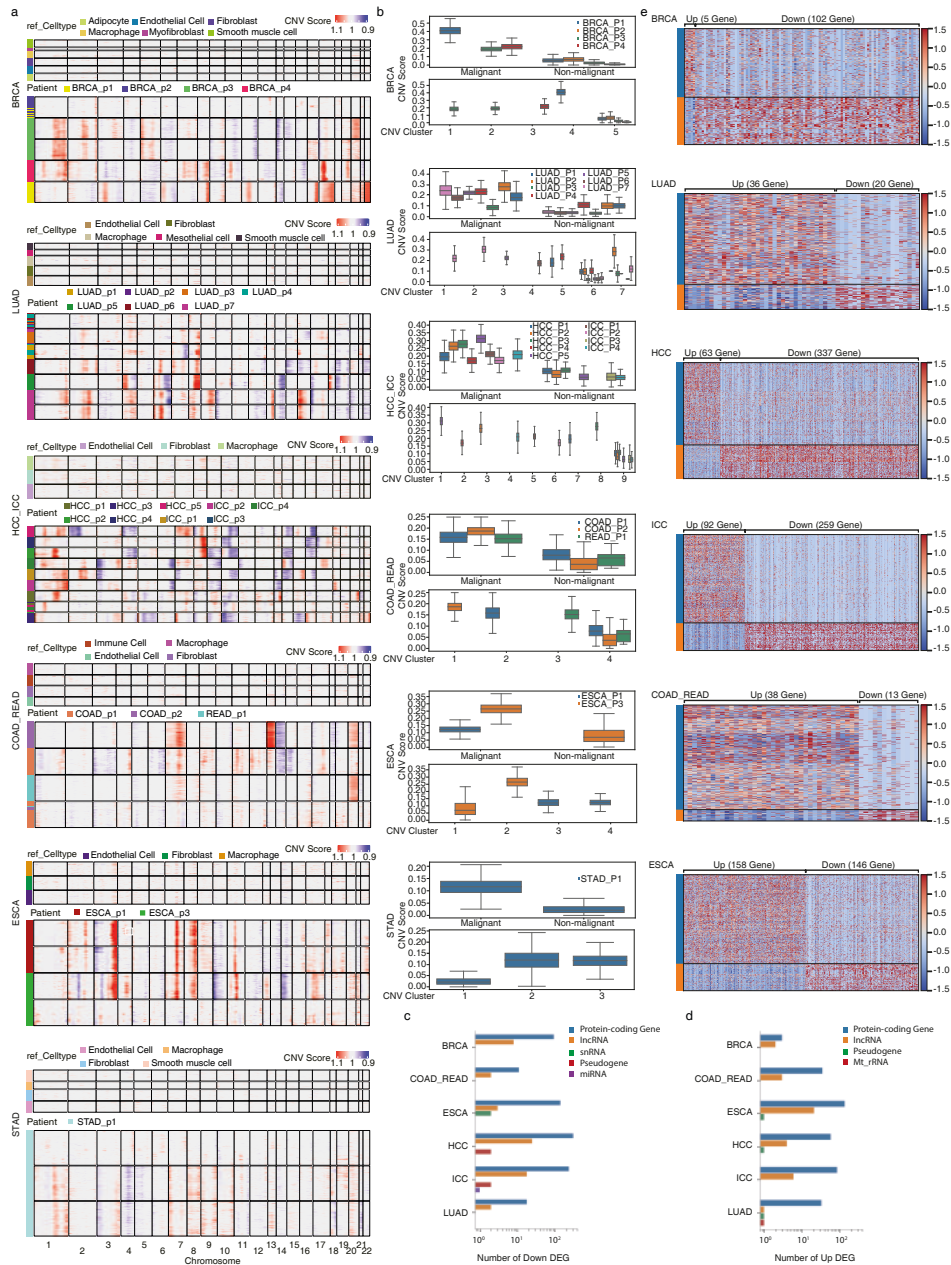

105

106 **Supplementary Figure 6. CNV profiles inferred from snRNA-seq data for**  
 107 **epithelial tumor**

108 **a)** Hierarchical clustering results of CNV inferred from snRNA-seq data for epithelial  
 109 tumor samples. Chromosomal amplification (red) and deletion (blue) are inferred in  
 110 each chromosomal position (columns) across the single cells (rows). Top: reference  
 111 cells not expected to contain CNVs, color-coded for cell type. Bottom: malignant and  
 112 non-malignant epithelial cell, color-coded for patient. **b)** CNV score calculated by

113 inferCNV for epithelial tumors. **c-d**) The number of down- (c) and up- (d) regulated  
114 genes between malignant and non-malignant epithelial cell for each cancer type. Color-  
115 coded for gene type. **e**) Heatmap of common DEGs for each cancer type.

116

117

118

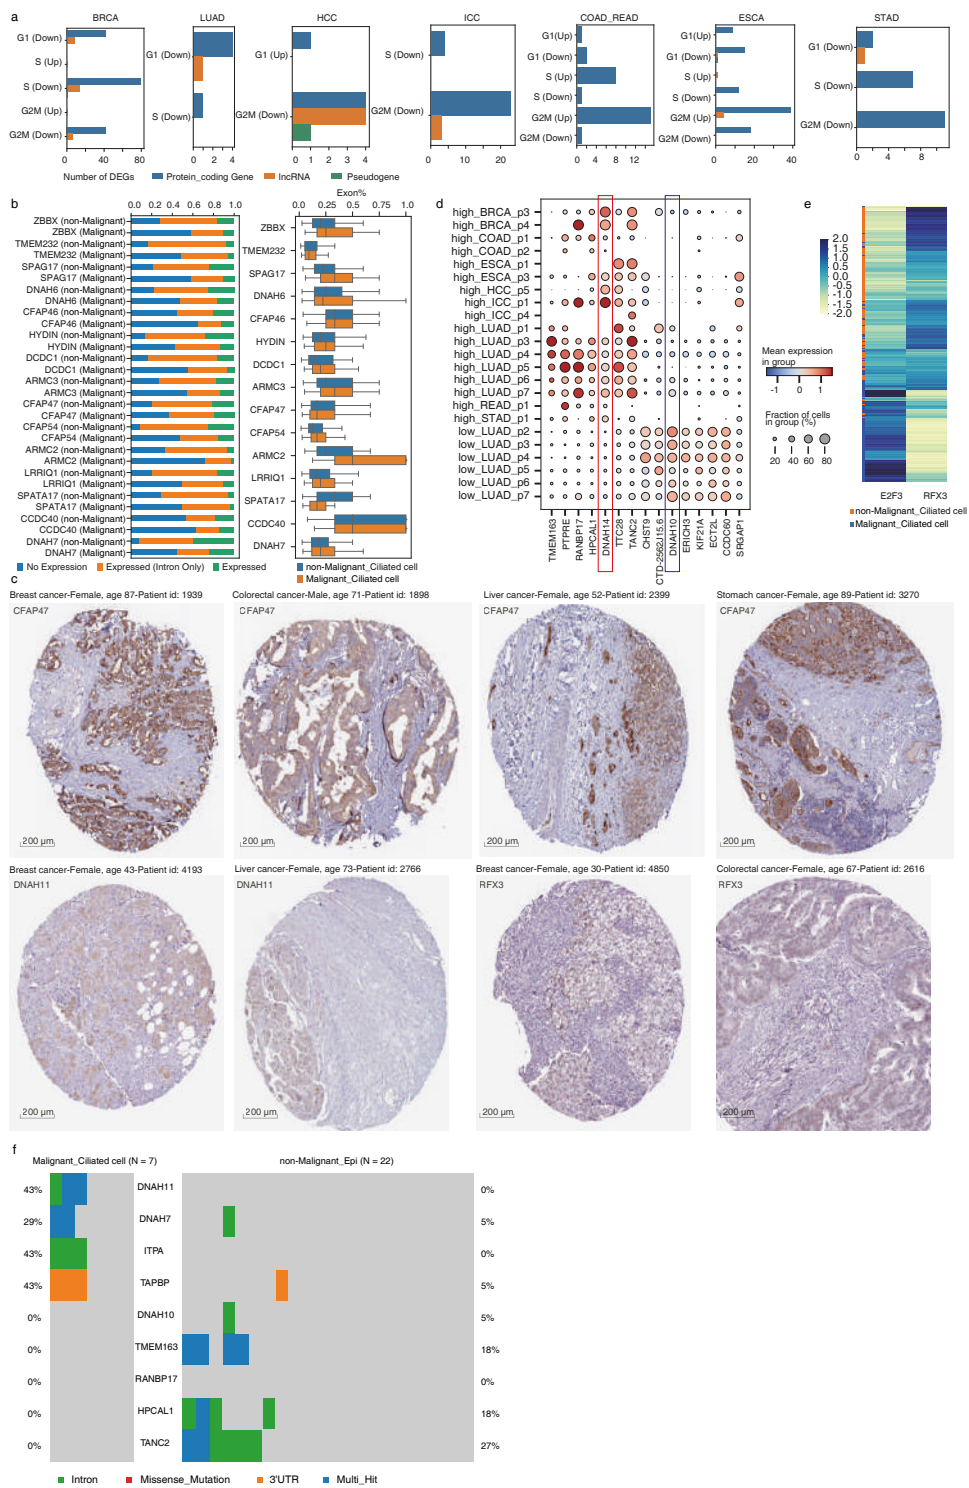

119

120 **Supplementary Figure 7. Patterns of proliferating malignant cells and ciliated-**  
 121 **like malignant cells**

122 **a) The number of DEGs between proliferating malignant and non-malignant epithelial**

123 cell in each cancer type. Color-coded for gene type. **b)** Expression proportions and exon  
124 proportions of selected cilia-related genes in non-malignant lung ciliated cells and  
125 ciliated-like malignant cells. **c)** Immunohistochemistry assay of cilia marker genes  
126 (CFAP47, DNAH11 and RFX3) in tumors (from Human Protein Atlas [proteatlas.org](http://proteatlas.org)).  
127 **d)** DEGs between malignant ciliated-like cell and non-malignant lung ciliated cell. **e)**  
128 Differentially expressed transcriptional factors E2F3 and RFX3 between malignant  
129 ciliated-like cell and non-malignant lung ciliated cell. **f)** Mutation profiles of several  
130 ciliated-related genes and several DEGs between malignant ciliated-like cell and non-  
131 malignant lung ciliated cell, in malignant ciliated cell and non-malignant epithelial cell.

132

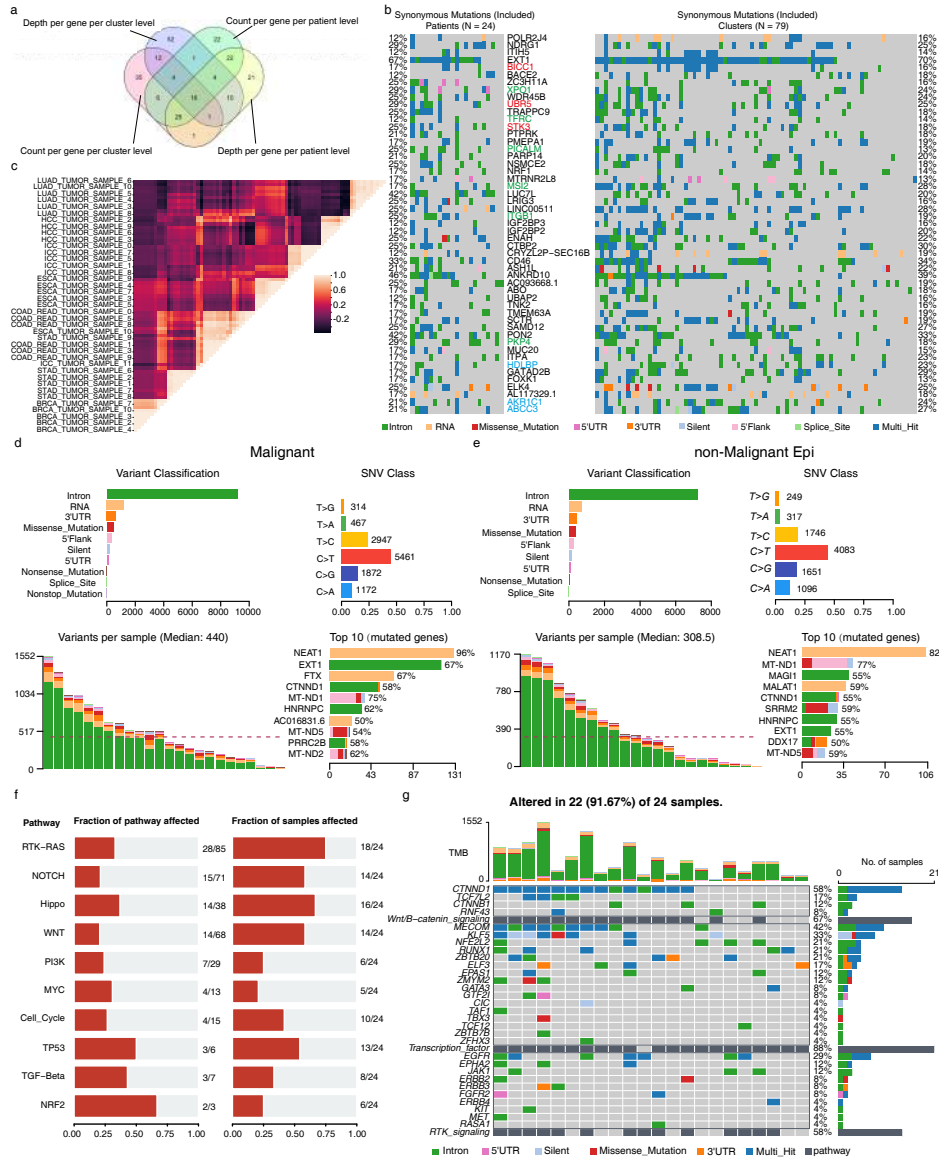

133

134 **Supplementary Figure 8. Mutation characteristics of malignant epithelial cell**

135 **a)** Intersection of 4 mutations profile matrix, count per gene indicates the number of  
 136 mutation loci per gene, depth per gene indicates the depth of mutations per gene, per  
 137 cluster level indicates 1000 cells sampled from annotated pan-cancer cluster, per patient  
 138 level indicates 1000 cells sampled from individual patient. **b)** Co-Oncoplot of mutation  
 139 counts include synonymous mutations between patient level and pan-cancer cluster  
 140 level, 24 patient samples and 79 cluster samples in total (rows: commonly mutated gene,  
 141 columns: samples of 1000-cell size), colored by mutation types. **c)** Correlation heatmap  
 142 using principle components of mutation count matrix of all cancer types, mutations

143 profiles from same cancer type show strong correlation. **d)-e)** Summarization of  
144 detected mutation variants of malignant samples and non-malignant samples. Variant  
145 classification, SNV class, Variant counts per sample and top 10 mutated genes are  
146 shown. **f)** Well-known pathway affected in malignant cells. **g)** Most affected pathways  
147 including WNT, transcription factor and RTK-RAS and their affected mutated genes  
148 shown in 24 patient samples.

149

150

151

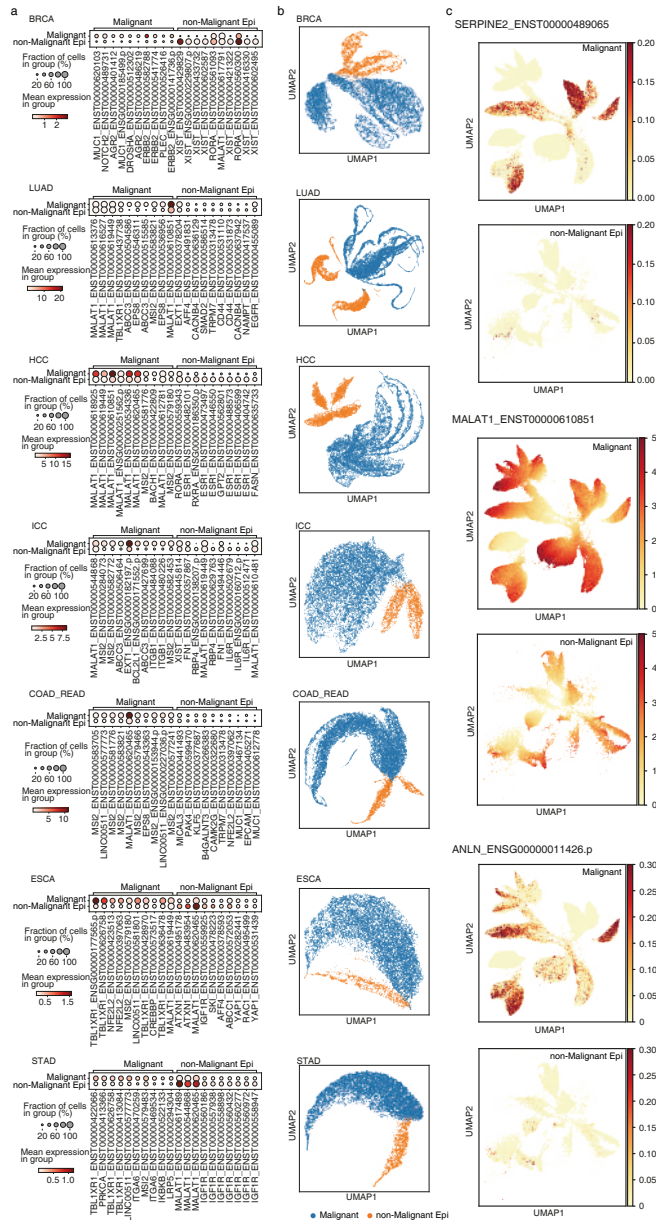

152

153 **Supplementary Figure 9. Expression of cancer markers**

154 **a)** Differential transcript expression for 7 cancer types (BRCA, LUAD, HCC, 155  
 COAD\_READ, ESCA and STAD) of known cancer markers. **b)** UMAP of pseudo 156  
 transcript expression shows high distinction between malignant cells and non- 157  
 malignant epithelium cells. **c)** Significant high expression of 158  
 SERPINE2\_ENST00000489065, MALAT1\_ENST00000610851 and 159  
 ANLN\_ENSG00000011426.p shown in malignant cells and low expression in non- 160  
 malignant epithelium cells.
